# Supplementary material for: Spirolides in Bivalve Mollusk of the Galician (NW Spain) Coast: Interspecific, Spatial, Temporal Variation and Presence of an Isomer of 13-Desmethyl Spirolide C
Source: Toxins (Basel). 2022 Dec 24;15(1):13. doi: 10.3390/toxins15010013 (PMC9861247; doi:10.3390/toxins15010013)
Supplement: Supplementary file 1 [file toxins-15-00013-s001.zip › toxins-2076007-supplementary.pdf]

Article

# Spirolides in Bivalve Mollusk of the Galician (NW Spain) Coast: Interspecific, Spatial, Temporal Variation and Presence of an Isomer of 13-Desmethyl Spirolide C

Juan Blanco, Fabiola Arévalo, Ángeles Moroño, Jorge Correa, Araceli E. Rossignoli and Juan Pablo Lamas

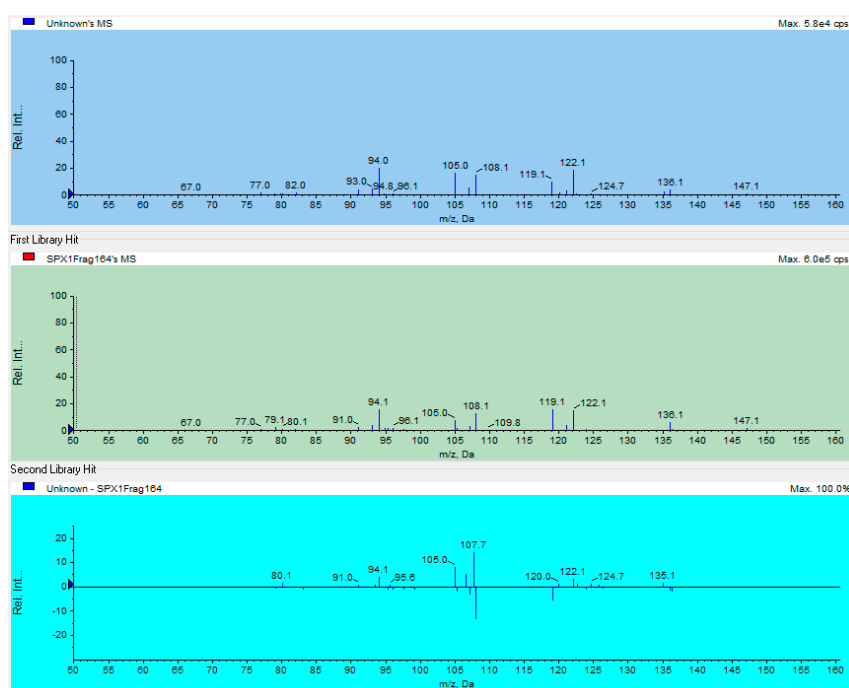

**Figure S1.** MS3 fragmentation spectra of the 13-desmethyl spirolide C. Fragmentation of the 164  $m/z$  fragment (top panel), its isomer (middle panel) and differences between them (lower panel).

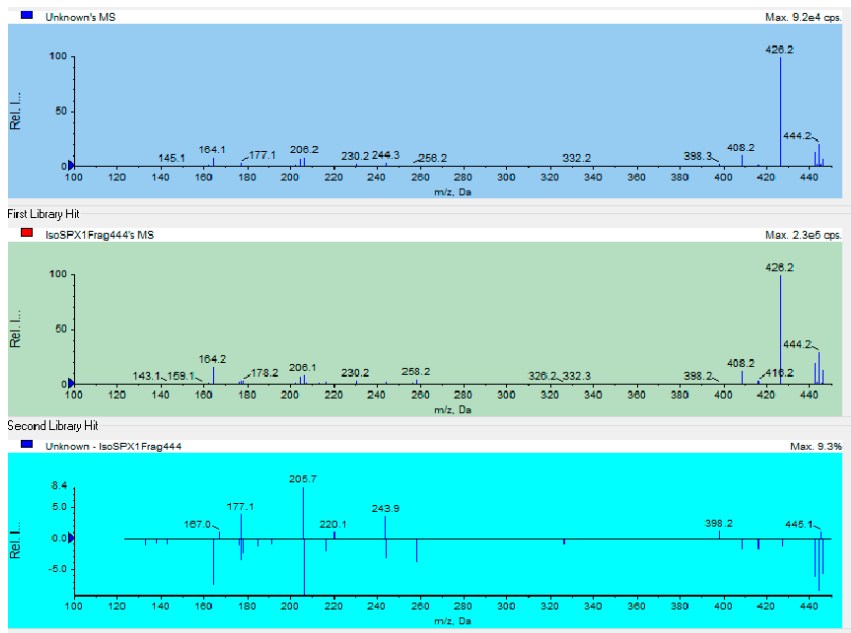

**Figure S2.** MS3 fragmentation spectra of the 13-desmethyl spirolide C. Fragmentation of the 444 *m/z* fragment (top panel), its isomer (middle panel) and differences between them (lower panel).

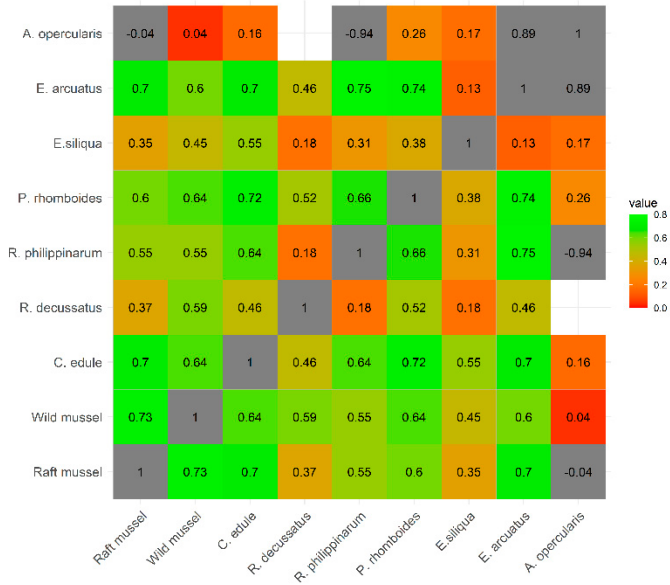

**Figure S3.** Matrix of correlations of 13desmSPXC concentration between bivalve species.

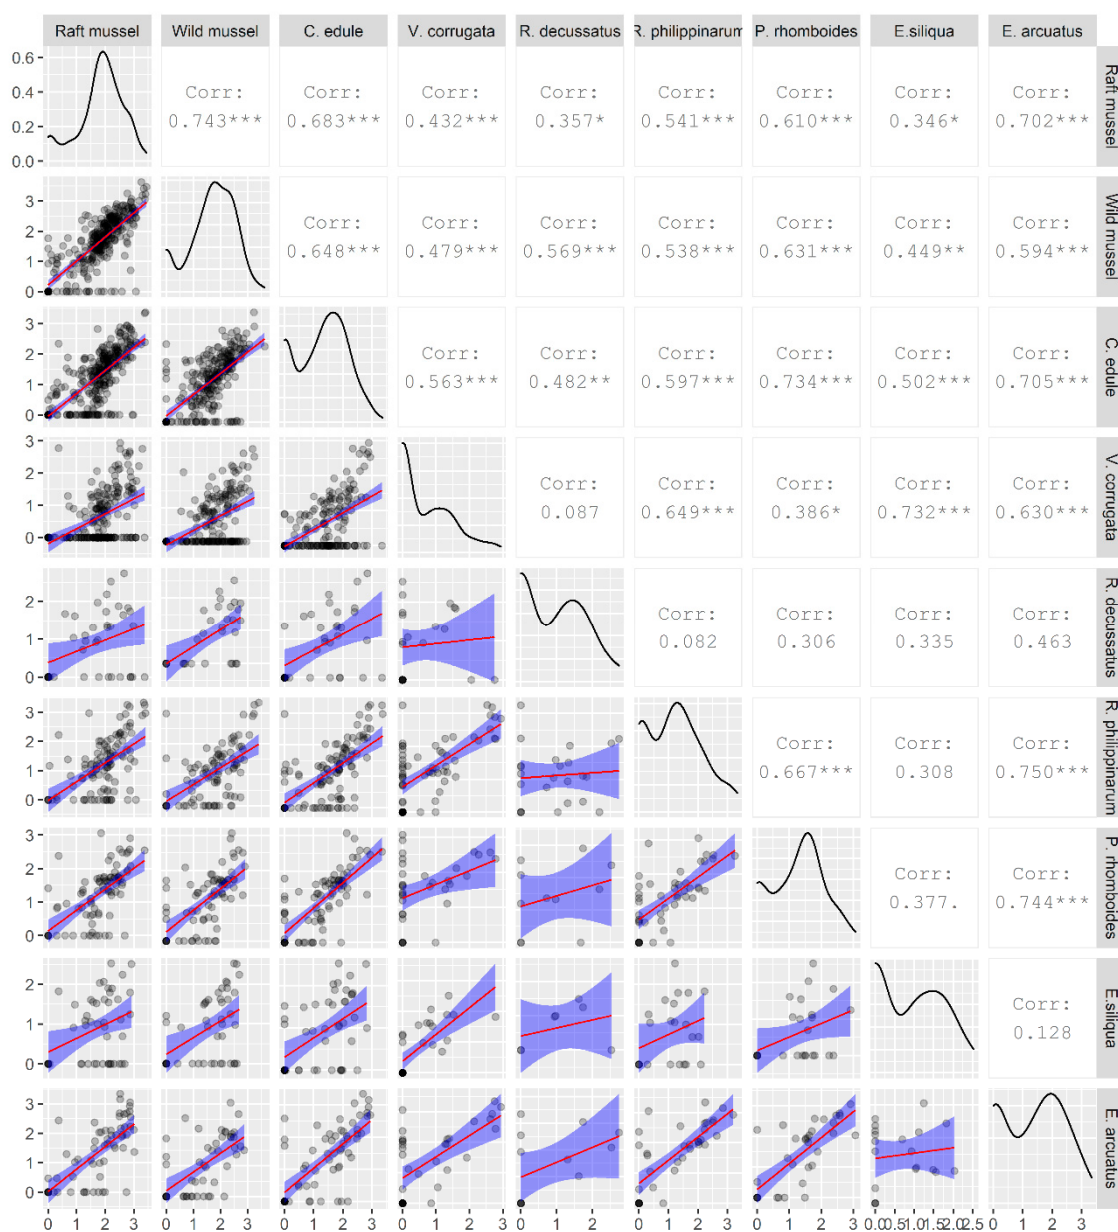

Figure S4. Correlations and regressions of 13desmSPXC concentration between bivalve species.

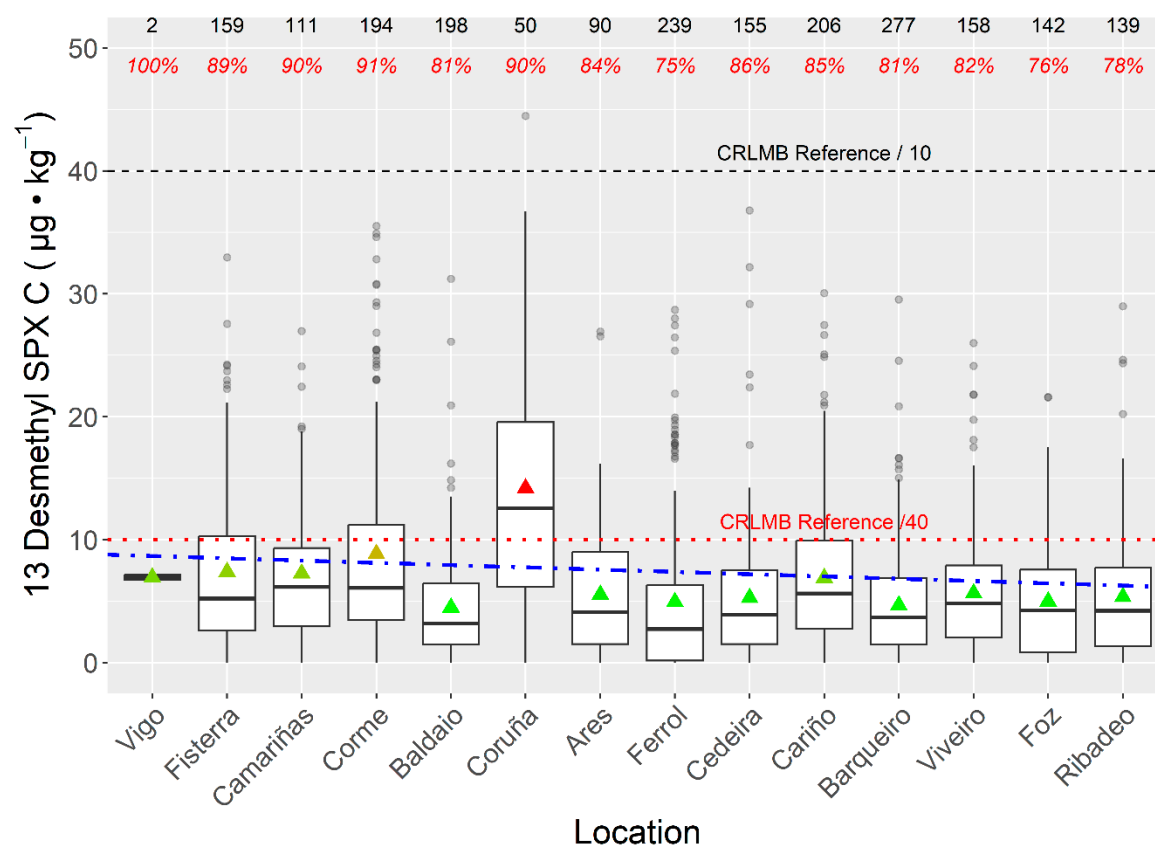

**Figure S5.** 13-desmethyl spirolide C concentration in wild mussels from the studied locations. Boxes and other symbols as in figure 6. Numbers at the top are the number of samples analyzed and the percentages of samples in which the compounds were detected (prevalence). The blue dashed-dot line shows the south-northeast trend.

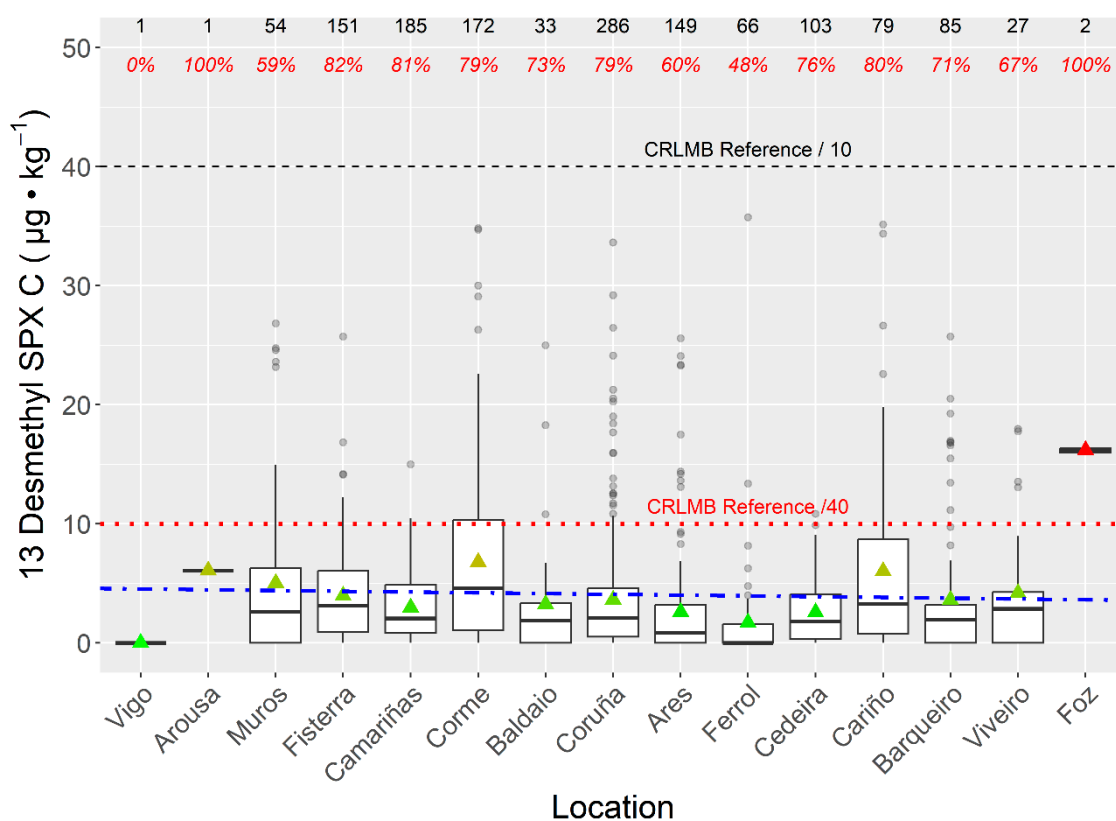

**Figure S6.** 13-desmethyl spirolide C concentration in cockle from the studied locations. Boxes and other symbols as in figure 6. Numbers at the top are the number of samples analyzed and the percentages of samples in which the compounds were detected (prevalence). The blue dashed-dotted line shows the south-northeast trend excluding the locations with less than three observations..

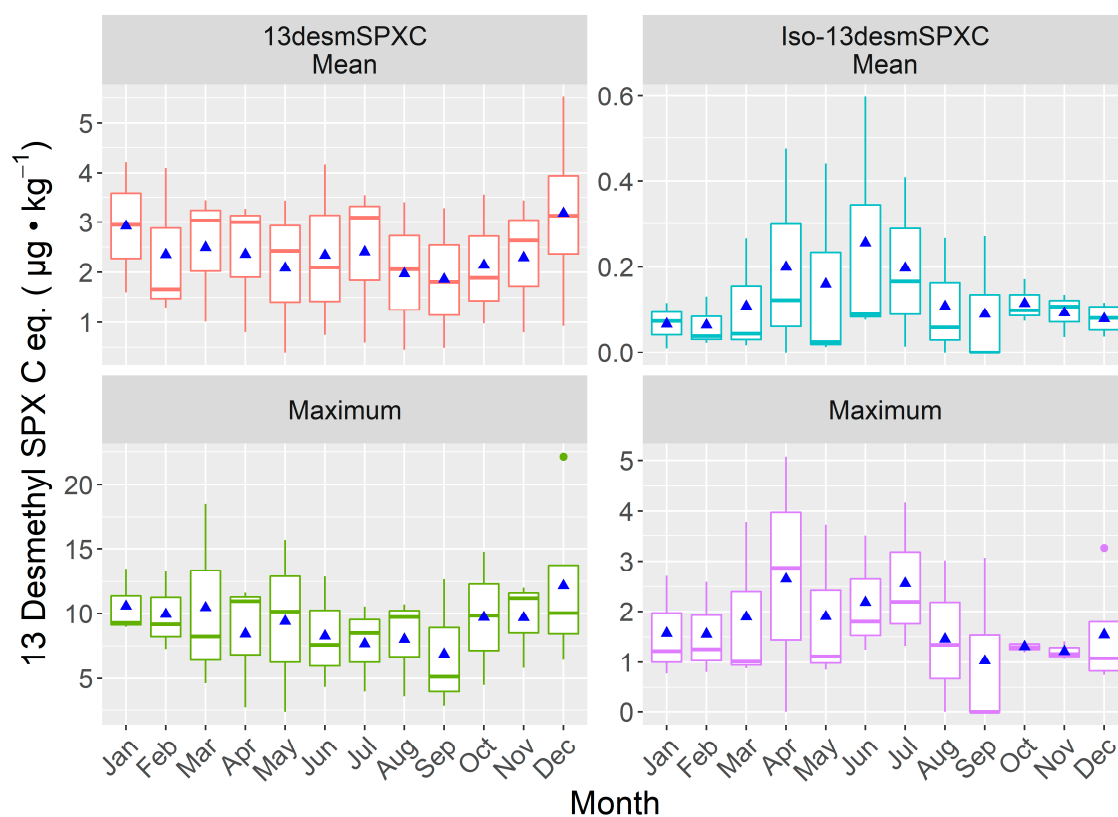

**Figure S7.** Seasonal variation of the mean and maximum levels of 13-desmethyl spiroside C and its isomer along the period of study in which the two compounds were analyzed. Boxes and other symbols as in figure 6.

**Table S1.** Number of samples of 13-desmethyl SPX C analyzed by year and month.

| Year | Jan | Feb | Mar | Apr | May | Jun | Jul | Aug | Sep | Oct | Nov | Dec |     |
|------|-----|-----|-----|-----|-----|-----|-----|-----|-----|-----|-----|-----|-----|
| 2014 |     | 41  | 8   | 37  | 41  | 63  | 62  | 85  | 84  | 84  | 100 | 109 | 100 |
| 2015 |     | 156 | 146 | 178 | 117 | 104 | 161 | 113 | 151 | 155 | 127 | 109 | 114 |
| 2016 |     | 114 | 120 | 143 | 114 | 117 | 122 | 127 | 134 | 113 | 115 | 130 | 121 |
| 2017 |     | 131 | 117 | 141 | 131 | 134 | 140 | 160 | 165 | 155 | 157 | 131 | 113 |
| 2018 |     | 129 | 92  | 91  | 118 | 109 | 86  | 103 | 111 | 111 | 138 | 110 | 97  |
| 2019 |     | 112 | 98  | 87  | 82  | 70  | 90  | 123 | 94  | 109 | 112 | 93  | 90  |
| 2020 |     | 96  | 80  | 79  | 48  | 64  | 107 | 93  | 94  | 86  | 78  | 88  | 79  |
| 2021 |     | 78  | 88  | 117 | 91  | 74  | 89  | 102 | 108 | 82  | 97  | 93  | 91  |

**Table S2.** Number of samples of Iso-13-desmethyl SPX C analyzed by year and month.

| Year | Jan | Feb | Mar | Apr | May | Jun | Jul | Aug | Sep | Oct | Nov | Dec |
|------|-----|-----|-----|-----|-----|-----|-----|-----|-----|-----|-----|-----|
| 2018 | --  | --  | --  | --  | --  | --  | --  | --  | --  | --  | --  | 92  |
| 2019 | 112 | 98  | 87  | 82  | 70  | 90  | 123 | 94  | 109 | 112 | 93  | 90  |
| 2020 | 96  | 80  | 79  | 48  | 64  | 107 | 93  | 94  | 86  | 78  | 88  | 79  |
| 2021 | 78  | 88  | 117 | 91  | 74  | 89  | 102 | 108 | 82  | 97  | 93  | 91  |

**Table S3.** Number of samples of 13-desmethyl SPX C and its isomer by bivalve.

| Nome_Galego             | 13-desmSPXC | Iso-13-desmSPXC |
|-------------------------|-------------|-----------------|
| <i>Raft mussel</i>      | 5778        | 2017            |
| <i>Wild mussel</i>      | 2120        | 626             |
| <i>C. edule</i>         | 1394        | 484             |
| <i>V. corrugata</i>     | 301         | 125             |
| <i>R. decussatus</i>    | 65          | 29              |
| <i>R. philippinarum</i> | 167         | 42              |
| <i>P. rhomboides</i>    | 113         | 12              |
| <i>E.siliqua</i>        | 62          | 11              |
| <i>E. arcuatus</i>      | 116         | 8               |
| <i>A. opercularis</i>   | 31          | -               |

**Table S4.** ANOVA of the spatial and temporal variations.

|               | Df   | Sum Sq | Mean Sq |
|---------------|------|--------|---------|
| Location      | 17   | 14327  | 842.8   |
| Week          | 337  | 106634 | 316.4   |
| Location:Week | 4008 | 68873  | 17.2    |
